# Supplementary material for: Superhydrophilic–superhydrophobic integrated system based on copper mesh for continuous and efficient oil–water separation
Source: Royal Society of Chemistry journal article supplement (doi:10.1039/d3ra08909f), 2024-01-01
Supplement: d3ra08909f1.pdf [file d3ra08909f1.pdf]

### Supplementary information

## Superhydrophilic-superhydrophobic integrated system based on copper mesh for continuous and efficient oil-water separation

Zhaohe Huang\*, Zhenzhong Wang, Shiqiang Wang, XiaoWen Shan, Shumeng Yin, Bin Tao

State Key Laboratory of Chemical Safety, SINOPEC Research Institute of Safety Engineering Co., Ltd., Qingdao, Shandong, 266000, PR China

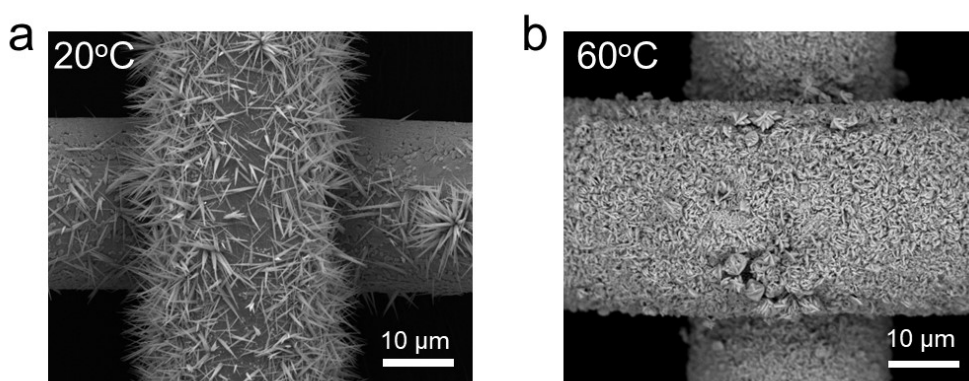

Fig. S1 SEM images of the oxidized copper mesh with the oxidation temperatures of (a) 20°C, and (b) 60°C.

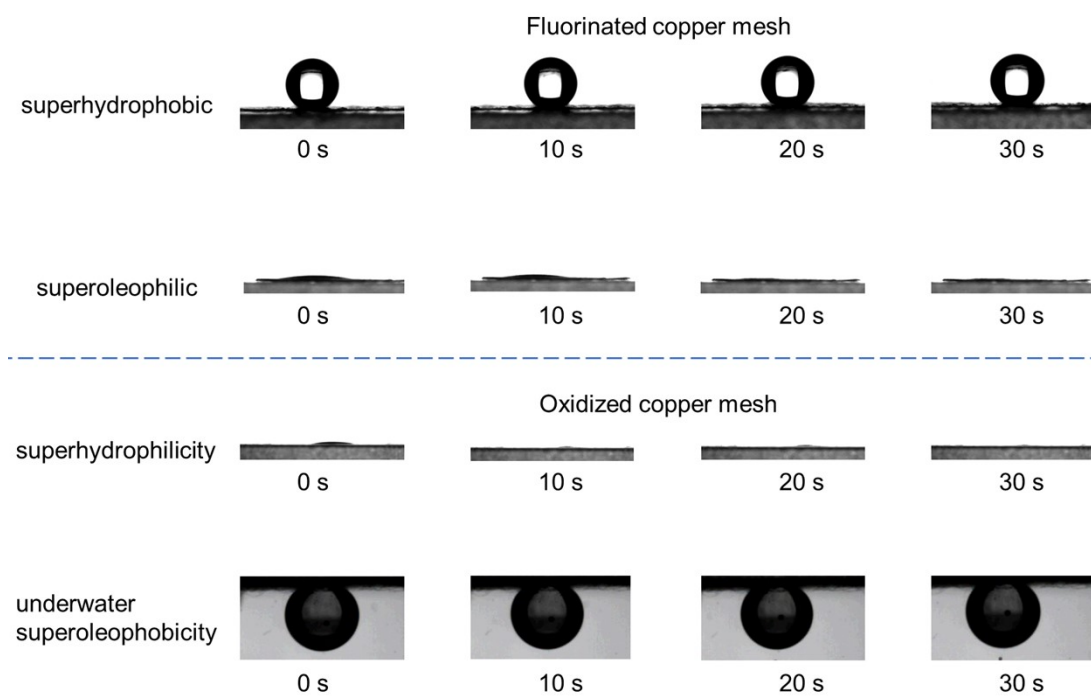

Fig.S2 The contact angles changes of fluorinated and oxidized copper meshes over time.

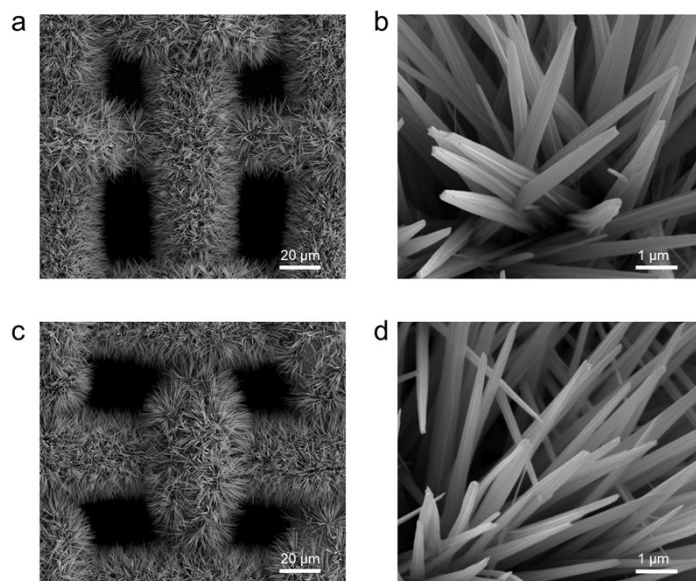

Fig.S3 SEM images of the (a, b) oxidized and (c, d) fluorinated copper meshes after oil/water separation.

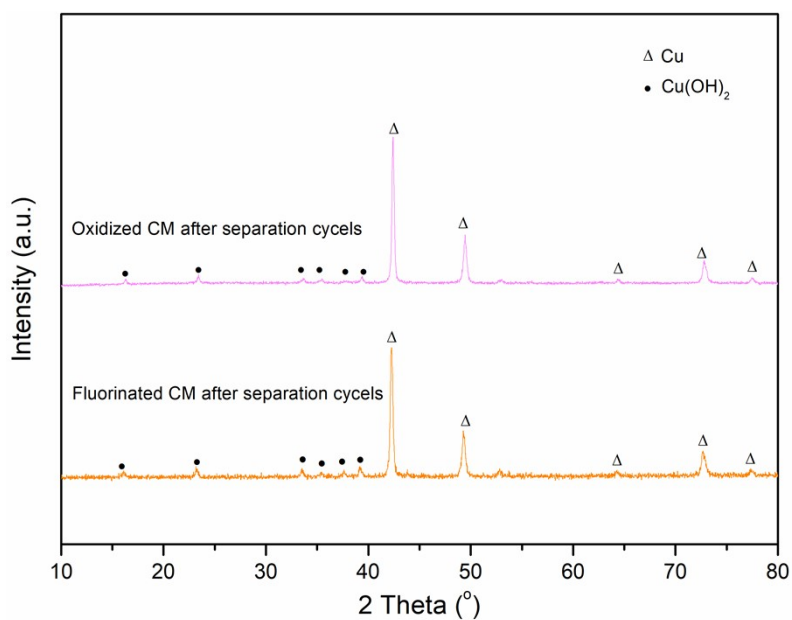

Fig.S4 XRD patterns of the oxidized and fluorinated copper meshes after oil/water separation.

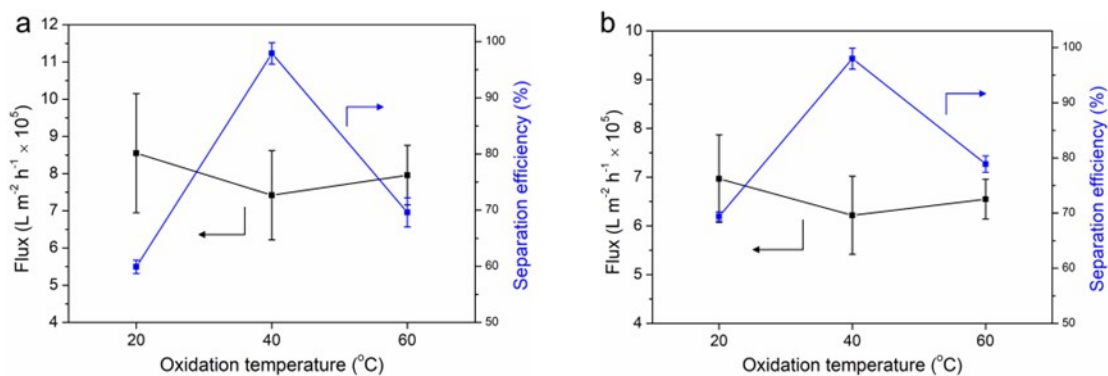

Fig. S5 The separation performance of (a) fluorinated copper mesh and (b) oxidized copper mesh at different oxidation temperature.

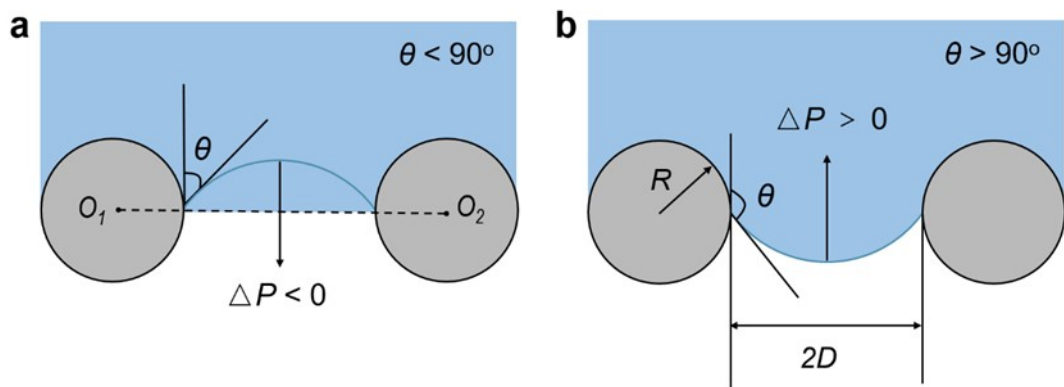

Fig. S6 Schematic diagram of the mechanism of water-removing oxidized copper oxide mesh (a) and oil-removing fluorinated copper mesh (b) for oil-water mixture separation.
